# Supplementary material for: Laplacian free and asymptotic corrected semilocal exchange potential applied to the band gap of solids
Source: Royal Society of Chemistry journal article supplement (doi:10.1039/c9cp03356d), 2019-01-01
Supplement: c9cp03356d1.pdf [file c9cp03356d1.pdf]

# supplemental materials: Laplacian free and asymptotic corrected semilocal exchange potential applied to band gap of solids

Abhilash Patra,<sup>\*,†</sup> Subrata Jana,<sup>\*,†</sup> Hemanadhan Myneni,<sup>‡</sup> and Prasanjit Samal<sup>\*,†</sup>

*School of Physical Sciences, National Institute of Science Education and Research, HBNI, Bhubaneswar 752050, India, and Department of Physics, Temple University, Philadelphia, PA 19122-1801, USA*

E-mail: [abhilashpatra@niser.ac.in](mailto:abhilashpatra@niser.ac.in); [subrata.jana@niser.ac.in](mailto:subrata.jana@niser.ac.in); [psamal@niser.ac.in](mailto:psamal@niser.ac.in)

In this supplemental material for the article “Laplacian free and asymptotic corrected semilocal exchange potential applied to the band gap of solids”, first, we present band gaps of a set of well known solids in Table 1, using the potentials discussed in the article. The band gaps for PBE functional underestimates in all cases. In addition to PBE, we show band gaps for TBMBJ, mBR-TBMBJ, HSE methods and compared to the experimental values. It can be observed that the mean absolute errors (MAE) for mBR-TBMBJ and HSE are same and better than TBMBJ. Fig. 1 represents the box plot for the absolute errors of all the methods present in Table 1. Then the space groups of all the oxides, dichalcogenides, and oligoacenes are given in TABLE 2 and TABLE 3. A  $3 \times 3$  supercell of silicon doped graphenes of different percentage of concentrations are shown.

---

\*To whom correspondence should be addressed

<sup>†</sup>School of Physical Sciences, National Institute of Science Education and Research, HBNI, Bhubaneswar 752050, India

<sup>‡</sup>Department of Physics, Temple University, Philadelphia, PA 19122-1801, USA

Table 1: Fundamental band gaps of semiconducting well known solids.

| Solids                          | PBE  | TBMBJ | mBR-TbmBJ | HSE06 | Expt. |
|---------------------------------|------|-------|-----------|-------|-------|
| AgCl                            | 0.90 | 2.82  | 3.11      | 2.41  | 3.25  |
| AgBr                            | 0.66 | 2.34  | 2.60      | 2.01  | 2.71  |
| AlP                             | 1.58 | 2.29  | 2.59      | 2.30  | 2.50  |
| AlAs                            | 1.44 | 2.12  | 2.64      | 2.11  | 2.23  |
| AlSb                            | 1.23 | 1.78  | 1.91      | 1.80  | 1.69  |
| AgI                             | 1.33 | 2.68  | 2.98      | 2.48  | 2.91  |
| Al <sub>2</sub> O <sub>3</sub>  | 6.34 | 8.52  | 8.69      | 8.08  | 8.80  |
| BaS                             | 2.25 | 3.32  | 3.72      | 3.11  | 3.88  |
| BaSe                            | 1.98 | 2.87  | 3.22      | 2.79  | 3.58  |
| BaTe                            | 1.59 | 2.27  | 2.55      | 2.31  | 3.08  |
| BAs                             | 1.18 | 1.67  | 1.82      | 1.86  | 1.46  |
| BeO                             | 7.68 | 10.17 | 10.31     | 9.48  | 10.6  |
| BP                              | 1.27 | 1.92  | 2.08      | 1.98  | 2.10  |
| CaO                             | 3.67 | 5.34  | 5.55      | 5.26  | 7.00  |
| CaF <sub>2</sub>                | 7.32 | 10.52 | 10.88     | 9.37  | 11.8  |
| CdTe                            | 0.75 | 1.76  | 1.99      | 1.57  | 1.61  |
| CuCl                            | 0.48 | 1.64  | 1.62      | 2.37  | 3.4   |
| CuBr                            | 0.37 | 1.57  | 1.58      | 2.15  | 3.07  |
| CuI                             | 1.12 | 2.15  | 2.18      | 2.65  | 3.12  |
| Cu <sub>2</sub> O               | 0.62 | 0.93  | 0.94      | 1.98  | 2.17  |
| CuSCN                           | 2.25 | 2.66  | 2.67      | 3.60  | 3.94  |
| GaP                             | 1.63 | 2.3   | 2.57      | 2.28  | 2.35  |
| GaSb                            | 0.11 | 1.00  | 1.02      | 0.88  | 0.82  |
| InP                             | 0.66 | 1.62  | 1.83      | 1.43  | 1.42  |
| InAs                            | 0.00 | 0.74  | 0.90      | 0.45  | 0.42  |
| InSb                            | 0.00 | 0.48  | 0.59      | 0.45  | 0.24  |
| InN                             | 0.02 | 0.94  | 0.83      | 0.70  | 0.72  |
| MgTe                            | 2.49 | 4.11  | 4.52      | 3.39  | 3.60  |
| SiO <sub>2</sub>                | 5.84 | 7.70  | 7.68      | 7.39  | 8.90  |
| SnO <sub>2</sub>                | 1.57 | 3.43  | 3.42      | 2.88  | 3.60  |
| SnTe                            | 0.06 | 0.18  | 0.32      | 0.17  | 0.36  |
| Sb <sub>2</sub> Te <sub>3</sub> | 0.16 | 0.30  | 0.30      | 0.31  | 0.28  |
| SnSe                            | 0.58 | 0.78  | 0.96      | 0.98  | 0.90  |
| SrTiO <sub>3</sub>              | 1.92 | 2.72  | 2.79      | 3.29  | 3.30  |
| TiO <sub>2</sub>                | 2.14 | 2.99  | 3.07      | 3.57  | 3.40  |
| VO <sub>2</sub>                 | 0.00 | 0.54  | 0.55      | 1.03  | 0.60  |
| ZnO                             | 0.75 | 2.65  | 2.42      | 3.30  | 3.44  |
| MAE                             | 1.49 | 0.53  | 0.49      | 0.49  | —     |

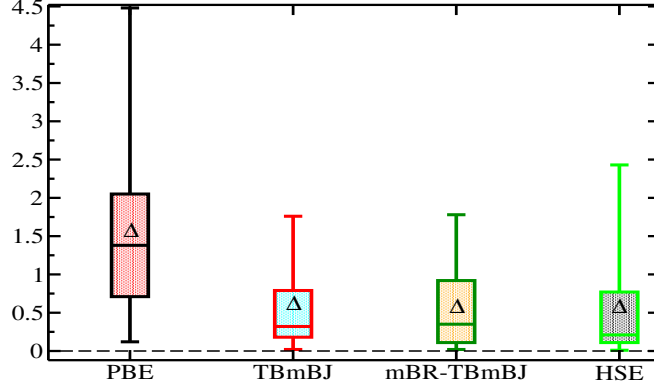

Figure 1: Box plot for the mean absolute error of semiconducting solids present in Table 1. The explanations about the box plot can be found in the main article.

Table 2: Space groups of discussed oxides, and Transition metal dichalcogenides used in the article.

| Oxides                           | Space groups | TMDs              | Space groups |
|----------------------------------|--------------|-------------------|--------------|
| BiCuOS                           | 129(P4/nmm)  | HfS <sub>2</sub>  | 164(P-3m1)   |
| BiCuOTe                          | 129(P4/nmm)  | HfSe <sub>2</sub> | 164(P-3m1)   |
| LaCuOS                           | 129(P4/nmm)  | MoS <sub>2</sub>  | 194(P63/mmc) |
| LaCuOTe                          | 129(P4/nmm)  | MoSe <sub>2</sub> | 194(P63/mmc) |
| Ag <sub>2</sub> PdO <sub>2</sub> | 71(Imm)      | WS <sub>2</sub>   | 194(P63/mmc) |
| CuAlO <sub>2</sub>               | 166(R-3m)    | WSe <sub>2</sub>  | 194(P63/mmc) |
| LiCoO <sub>2</sub>               | 166(R-3m)    | ZrS <sub>2</sub>  | 164(P-3m1)   |
| BaSnO <sub>3</sub>               | 221(Pm-3m)   | ZrSe <sub>2</sub> | 164(P-3m1)   |
| NaBiO <sub>3</sub>               | 148(R-3)     | ZrSeS             | 156(P3m1)    |
| LiBiO <sub>3</sub>               | 56(Pccn)     |                   |              |
| LaMnO <sub>3</sub>               | 62(Pnma)     |                   |              |
| PbTiO <sub>3</sub>               | 99(P4mm)     |                   |              |
| BaTiO <sub>3</sub>               | 221(Pm-3m)   |                   |              |
| LiNbO <sub>3</sub>               | 161(R3c)     |                   |              |

Table 3: Space groups of discussed Transition metal monoxides and oligoacenes used in the article.

| TMOs | Space groups | Oligoacenes    | Space groups |
|------|--------------|----------------|--------------|
| CoO  | 166(R-3m)    | Napthalene(2A) | 14(P21/c)    |
| FeO  | 166(R-3m)    | Anthracene(3A) | 14(P21/n)    |
| MnO  | 166(R-3m)    | Tetracene(4A)  | 2(P-1)       |
| NiO  | 166(R-3m)    | Pentacene(5A)  | 2(P-1)       |

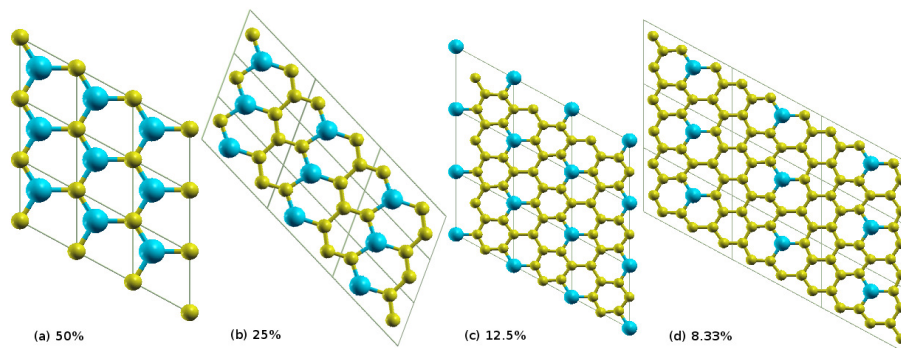

Figure 2:  $3 \times 3$  supercells of different percentage silicon doped graphene sheets are shown. Golden color balls represent carbon and cyan represents silicon.
